# Supplementary material
Source: PubMed Central journal article supplement (PMC7310534)
Supplement: NIHMS770467-supplement-1.pdf [file NIHMS770467-supplement-1.pdf]

| Supplementary Materials: Quantitative studies addressing associations between other religious measures and suicide risk |                 |                                                                   |                                      |                                      |                |
|-------------------------------------------------------------------------------------------------------------------------|-----------------|-------------------------------------------------------------------|--------------------------------------|--------------------------------------|----------------|
| <u>Religious measure</u>                                                                                                | <u>Location</u> | <u>Sample</u>                                                     | <u>Suicidal ideation</u>             | <u>Suicide attempt</u>               | <u>Suicide</u> |
| Author/Date                                                                                                             |                 |                                                                   |                                      |                                      |                |
| <b><u>Spiritual Well-Being Scale</u></b>                                                                                |                 |                                                                   |                                      |                                      |                |
| (Kaslow, Price et al. 2004)                                                                                             | United States   | 200 African-Americans (100 suicide attempters, 100 controls)      |                                      | Higher scores are protective         |                |
| (Meadows, Kaslow et al. 2005)                                                                                           | United States   | 200 African-American women (100 suicide attempters, 100 controls) |                                      | Higher scores are protective*        |                |
| (Walker, Utsey et al. 2005)                                                                                             | United States   | 423 African-Americans                                             | Higher scores are slight risk factor | Higher scores are slight risk factor |                |
| (Nad, Marcinko et al. 2008)                                                                                             | Croatia         | 45 veterans with PTSD, 32 controls                                | Higher scores are protective†        |                                      |                |
| (Taliaferro, Rienzo et al. 2009)                                                                                        | United States   | 522 undergraduates                                                | Higher scores are protective         |                                      |                |
| <b><u>Intrinsic Religiosity</u></b>                                                                                     |                 |                                                                   |                                      |                                      |                |
| (Walker and Bishop 2005)                                                                                                | United States   | 459 Undergraduates                                                | Protective                           |                                      |                |
| (Nad, Marcinko et al. 2008)                                                                                             | Croatia         | 45 veterans with PTSD, 32 controls                                | Protective†                          |                                      |                |
| (Stroppa and Moreira-Almeida 2013)                                                                                      | Brazil          | 168 bipolar outpatients                                           |                                      | NS                                   |                |
| (Caribe, Nunez et                                                                                                       | Brazil          | 110 suicide                                                       |                                      | Protective                           |                |

|                                               |                  |                                                       |                                                                                     |                                              |  |
|-----------------------------------------------|------------------|-------------------------------------------------------|-------------------------------------------------------------------------------------|----------------------------------------------|--|
| al. 2012)                                     |                  | attempters, 114<br>controls                           |                                                                                     |                                              |  |
| <b><u>Importance of religion</u></b>          |                  |                                                       |                                                                                     |                                              |  |
| (Huguelet, Mohr<br>et al. 2007)               | Switzerland      | 115 psychotic; 30 non-<br>psychotic patients          |                                                                                     | NS                                           |  |
| (Rasic, Kisely et<br>al. 2011)                | Canada           | 1,615 high school<br>students                         | low importance increased<br>risk in females; NS for<br>males                        | NS                                           |  |
| (Hoffman and<br>Marsiglia 2012)               | Mexico           | 702 high school<br>students                           | NS for past-week ideation                                                           |                                              |  |
| (Rushing,<br>Corsentino et al.<br>2013)       | United<br>States | 248 depressed older<br>adults                         | NS                                                                                  | NS                                           |  |
| (Birkholz, Gibson<br>et al. 2004)             | United<br>States | 49 hospice patients                                   | NS                                                                                  |                                              |  |
| (Albert, Rabkin et<br>al. 2005)               | United<br>States | 80 patients with<br>amyotrophic lateral<br>sclerosis  | Low importance increased<br>suicidal ideation                                       |                                              |  |
| <b><u>Subjective Religiosity Scale</u></b>    |                  |                                                       |                                                                                     |                                              |  |
| (Taylor, Chatters<br>et al. 2011)             | United<br>States | 1,621 Black<br>Caribbeans, 3,570<br>African-Americans | High scores are protective<br>for Black Caribbeans, NS for<br>African-Americans     | NS                                           |  |
| <b><u>Non-organizational religiosity‡</u></b> |                  |                                                       |                                                                                     |                                              |  |
| (Taylor, Chatters<br>et al. 2011)             | United<br>States | 1,621 Black<br>Caribbeans, 3,570<br>African-Americans | Reading religious material is<br>risk factor for Af-Americans,<br>NS for Caribbeans | NS                                           |  |
| <b><u>Religious coping§</u></b>               |                  |                                                       |                                                                                     |                                              |  |
| (Taylor, Chatters<br>et al. 2011)             | United<br>States | 1,621 Black Caribbeans                                | High importance of prayer<br>is risk factor, looking to God                         | High importance of<br>prayer is risk factor, |  |

|                                                                            |               |                                      |                                                |                                           |  |
|----------------------------------------------------------------------------|---------------|--------------------------------------|------------------------------------------------|-------------------------------------------|--|
|                                                                            |               |                                      | for strength is protective                     | looking to God for strength is protective |  |
| (Taylor, Chatters et al. 2011)                                             | United States | 3,570 African-Americans              | Looking to God for strength is protective      | Looking to God for strength is protective |  |
| <b><u>Private Religious activities</u></b>                                 |               |                                      |                                                |                                           |  |
| (Nonemaker, McNeely et al. 2003)                                           | United States | 16,306 adolescents                   | Protective                                     | Protective                                |  |
| (Caribe, Nunez et al. 2012)                                                | Brazil        | 110 suicide attempters, 114 controls |                                                | Protective                                |  |
| (Rushing, Corsentino et al. 2013)                                          | United States | 248 depressed older adults           | NS                                             | NS                                        |  |
| (Stroppa and Moreira-Almeida 2013)                                         | Brazil        | 168 bipolar outpatients              |                                                | NS                                        |  |
| <b><u>Prayer frequency</u></b>                                             |               |                                      |                                                |                                           |  |
| (Nkansah-Amankra, Diedhiou et al. 2012)                                    | United States | 9,412 adolescents                    | Praying "weekly" increased risk versus "never" | NS                                        |  |
| <b><u>Brief Multidimensional Measure of Religiousness/Spirituality</u></b> |               |                                      |                                                |                                           |  |
| (Spencer, Ray et al. 2012)                                                 | United States | 700 adults with advanced cancer      | Higher scores are protective                   |                                           |  |
| (Stratta, Capanna et al. 2012)                                             | Italy         | 426 earthquake victims; 522 controls | Negative spiritual coping increased risk †     |                                           |  |
| (Mihaljevic, Aukst-Margetic et                                             | Croatia       | 111 veterans with PTSD, 39 controls  | Negative religious coping‡ increased risk †    |                                           |  |

|                                                          |                  |                                                |                                               |                                                                                                                                    |  |
|----------------------------------------------------------|------------------|------------------------------------------------|-----------------------------------------------|------------------------------------------------------------------------------------------------------------------------------------|--|
| al. 2012)                                                |                  |                                                |                                               |                                                                                                                                    |  |
| <b><u>Brief Religious Coping Scale</u></b>               |                  |                                                |                                               |                                                                                                                                    |  |
| (Stroppa and<br>Moreira-Almeida<br>2013)                 | Brazil           | 168 bipolar<br>outpatients                     |                                               | NS                                                                                                                                 |  |
| <b><u>Religious (yes/no)</u></b>                         |                  |                                                |                                               |                                                                                                                                    |  |
| (Zhang and Xu<br>2007)                                   | China            | 74 suicide attempters                          | Religion increased risk*                      |                                                                                                                                    |  |
| (Sisask, Varnik et<br>al. 2010)                          | 7 countries      | 2,819 suicide<br>attempters, 5,484<br>controls |                                               | Religion is protective in<br>Brazil, Estonia, Iran, Sri<br>Lanka, but a risk factor<br>in South Africa (NS for<br>India & Vietnam) |  |
| <b><u>Religious Belief (yes/no)</u></b>                  |                  |                                                |                                               |                                                                                                                                    |  |
| (Xie, Chen et al.<br>2012)                               | China            | N=285 persons with<br>lupus                    | Increased if person has<br>"religious belief" |                                                                                                                                    |  |
| <b><u>Satisfaction with religious beliefs</u></b>        |                  |                                                |                                               |                                                                                                                                    |  |
| (Jarbin and Von<br>Knorring 2004)                        | Switzerland      | 88 adolescents with<br>first psychotic episode |                                               | Non-suicide attempters<br>had higher satisfaction                                                                                  |  |
| <b><u>OCD symptoms with religious/sexual content</u></b> |                  |                                                |                                               |                                                                                                                                    |  |
| (Torres, Ramos-<br>Cerqueria et al.<br>2011)             | Brazil           | 582 outpatients with<br>OCD                    | Religious/sexual content<br>increased risk    | NS                                                                                                                                 |  |
| <b><u>Perceived religiosity</u></b>                      |                  |                                                |                                               |                                                                                                                                    |  |
| (Assari, Lankarani<br>et al. 2012)                       | United<br>States | 5,181 African-<br>Americans                    | Higher perceived religiosity<br>is protective |                                                                                                                                    |  |
| <b><u>Religious versus secular schooling</u></b>         |                  |                                                |                                               |                                                                                                                                    |  |
| (Eskin 2004)                                             | Turkey           | 420 adolescents                                | Religious schooling is<br>protective          |                                                                                                                                    |  |

| <b><u>Belief in God</u></b>                                                                                                  |               |                                                                         |                                                     |    |            |
|------------------------------------------------------------------------------------------------------------------------------|---------------|-------------------------------------------------------------------------|-----------------------------------------------------|----|------------|
| (Zhang, Conwell et al. 2004)                                                                                                 | China         | 66 suicides, 66 matched controls (psychological autopsy)                |                                                     |    | NS         |
| <b><u>Belief in afterlife</u></b>                                                                                            |               |                                                                         |                                                     |    |            |
| (Zhang, Conwell et al. 2004)                                                                                                 | China         | 66 suicides, 66 matched controls (psychological autopsy)                |                                                     |    | NS         |
| (McClain-Jacobson, Rosenfeld et al. 2004)                                                                                    | United States | 276 adult terminal cancer patients admitted to palliative care hospital | NS after adjusting for spiritual well-being         |    |            |
| <b><u>Religious coping style</u></b>                                                                                         |               |                                                                         |                                                     |    |            |
| (Spann, Molock et al. 2006)                                                                                                  | United States | 176 African-American adolescents                                        | NS                                                  | NS |            |
| <b><u>Life Ownership Orientation Questionnaire</u></b>                                                                       |               |                                                                         |                                                     |    |            |
| (Kaplan, Ficker et al. 2007-2008)                                                                                            | United States | 233 undergraduates                                                      | NS                                                  |    |            |
| <b><u>Perception of personal religiousness scale</u></b>                                                                     |               |                                                                         |                                                     |    |            |
| (Simonson 2008)                                                                                                              | United States | 279 undergraduates                                                      | less personal religiousness is a risk factor        |    |            |
| <b><u>Spiritual involvement and beliefs scale</u></b>                                                                        |               |                                                                         |                                                     |    |            |
| (Simonson 2008)                                                                                                              | United States | 279 undergraduates                                                      | Less spiritual involvement/beliefs is a risk factor |    |            |
| <b><u>Practicing a religion</u></b>                                                                                          |               |                                                                         |                                                     |    |            |
| (Almasi, Belso et al. 2009)                                                                                                  | Hungary       | 194 suicides, 194 controls                                              |                                                     |    | Protective |
| <b><u>Presence of any religious characteristic (affiliation, service attendance, belief in God, belief in afterlife)</u></b> |               |                                                                         |                                                     |    |            |

|                                           |               |                            |                                                                                    |    |    |
|-------------------------------------------|---------------|----------------------------|------------------------------------------------------------------------------------|----|----|
| (Zhang, Wieczorek et al. 2010)            | China         | 392 suicides, 416 controls |                                                                                    |    | NS |
| <b><u>Religious orientation scale</u></b> |               |                            |                                                                                    |    |    |
| (Lester 2012)                             | United States | 149 undergraduates         | More intrinsic religiosity*, spiritual awareness*, and instability* increased risk | NS |    |
| <b><u>Spirituality scale</u></b>          |               |                            |                                                                                    |    |    |
| (Cooperman and Simoni 2005)               | United States | 207 HIV positive women     | Spirituality is protective                                                         | NS |    |
| <b><u>Religiosity</u></b>                 |               |                            |                                                                                    |    |    |
| (Wingate, Bobadilla et al. 2005)          | United States | 299 African-American males | NS                                                                                 |    |    |

\*Results were not significant after adjusting for covariates

†Analysis combined suicidal ideation and suicide attempt

‡Non-organizational religiosity includes: reading religious materials, watching religious television programs, listening to religious radio programs, prayer, asking someone to pray for you

§Religious coping includes: importance of prayer in stressful situations, looking to God for strength

¥ Negative religious coping includes: deferring all responsibility to God, feeling abandoned by God, blaming God for difficulties, experiencing spiritual tension or doubt, experiencing conflict and struggle with God
